# Supplementary material
Source: HighWire-hosted journal article supplement (https://www.annfammed.org/highwire/filestream/8854/field_highwire_adjunct_files/0/Liddy_Supp_App.pdf)
Supplement: Liddy_Supp_App.pdf [file Liddy_Supp_App.pdf]

## **Supplemental materials for:**

Liddy C, Moroz I, Afkham A, Keely E. Sustainability of a primary care-driven econsult service. *Ann Fam Med*. 2018;16(2):120-126.

**Supplemental Appendix 1: PCP close-out survey administered at the end of each eConsult.**

Q1: Which of the following best describes the outcome of this eConsultation for your patient?

- I was able to confirm a course of action that I originally had in mind
  - I got new advice for a new or additional course of action
  - I did not find the response very useful
  - None of the above (please comment)
- 

Q2: As a result of the eConsultation would you say that:

- Referral was originally contemplated but now avoided at this stage
  - Referral was originally contemplated and is still needed – this eConsult likely leads to a more effective visit
  - Referral was not originally contemplated and is still not needed – this eConsult provided useful feedback/instruction
  - Referral was not originally contemplated, but eConsult process resulted in a referral being initiated
  - There was no particular benefit to using eConsult in this case
  - Other (please explain)
- 

Q3: Please rate the overall value of the eConsult service for your patient:

Minimal       1       2       3       4       5      Excellent

Q4: Please rate the overall value of the eConsult service in this case for you as a primary care provider:

Minimal       1       2       3       4       5      Excellent

Q5: We would value any additional feedback you provide:

---
